# Supplementary material
Source: Springer Nature journal article supplement (https://www.springermedizin.de/resource/supplementary/12879_2011_1635_MOESM3_ESM.pdf/9442962)

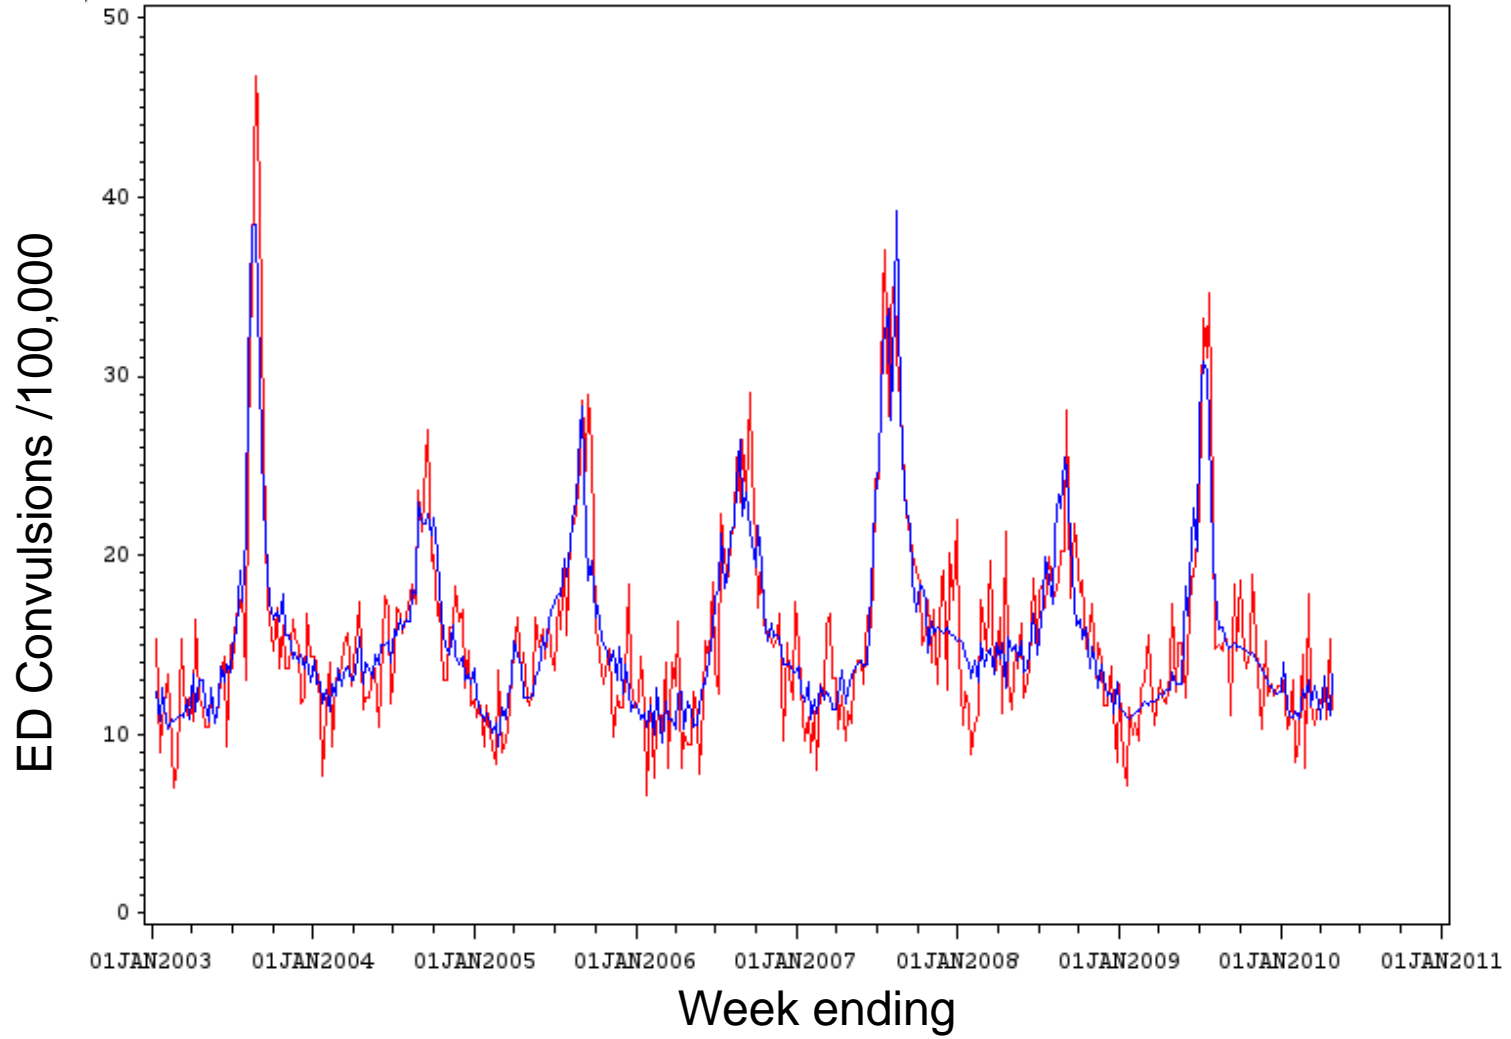

— Observed      — Predicted

Supplement: MOESM3 [file 9442962]
